# Supplementary material for: A Pilot Study of Polysubstance Use Sequences across the Lifespan among Assiniboine and Sioux People Who Use Injection Drugs
Source: MDPI journal article supplement (doi:10.3390/ijerph20010543), 2022-12-29
Supplement: s1 [file s1]

## Supplementary Material

Sequence index plots are shown below for each of the polysubstance use sequence classes identified in a sample of Assiniboine and Sioux people who use injection drugs (n=40). Polysubstance use combinations are shown relative to the 20 years of life preceding the interview. Age at time of polysubstance use combination is plotted on the X-axis. The number of individuals in the cluster is shown on the Y-axis, with individual bars (polysubstance use sequences) shown for each individual.

Cluster 1. (n=10)

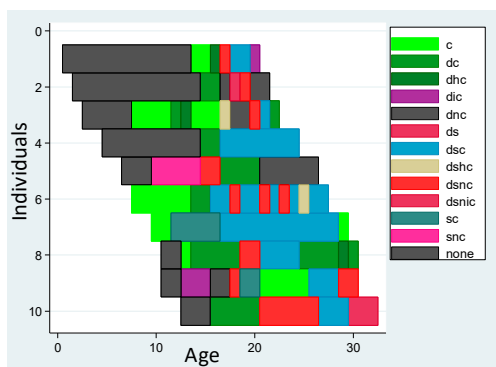

Cluster 2. (n=16)

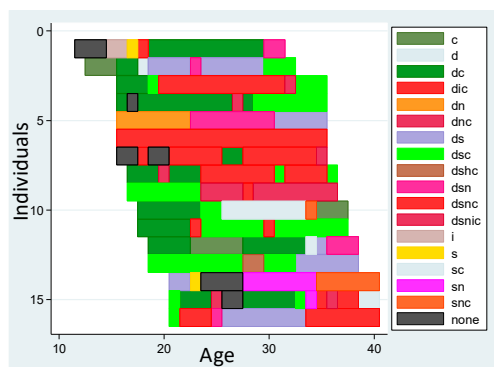

Cluster 3. (n=14)

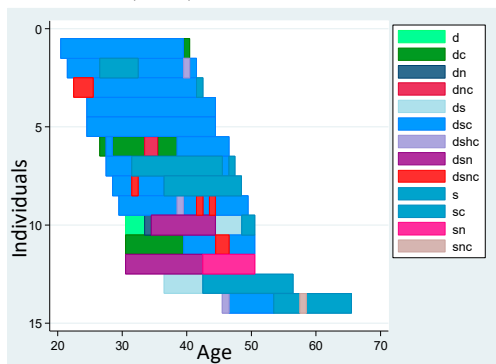

### Legend

|      |                     |
|------|---------------------|
| c    | Cannabis            |
| d    | Depressants         |
| h    | Hallucinogens       |
| n    | Narcotic Analgesics |
| s    | Stimulants          |
| i    | Inhalants           |
| none | No substances used  |
